# Supplementary material for: A family of coordination polymers assembled with a flexible hexacarboxylate ligand and auxiliary N-donor ligands: syntheses, structures, and physical properties
Source: Royal Society of Chemistry journal article supplement (doi:10.1039/c5ce00181a), 2015-01-01
Supplement: c5ce00181a1.pdf [file c5ce00181a1.pdf]

**Electronic supplementary information**

**A family of coordination polymers assembled with a flexible hexacarboxylate ligand and auxiliary N-donor ligands: syntheses, structures, and physical properties**

Hong-Mei Zhang,<sup>a</sup> Jin Yang,<sup>\*,a</sup> Ying-Ying Liu, Da-Wei Kang<sup>a,b</sup> and Jian-Fang Ma<sup>\*,a</sup>

*<sup>a</sup>Key Lab of Polyoxometalate Science, Department of Chemistry, Northeast Normal University, Changchun 130024, People's Republic of China*

*<sup>b</sup>College of Chemistry and Chemical Engineering, Inner Mongolia University for the Nationalities, Tongliao, 028000, People's Republic of China*

\* Correspondence authors

E-mail: yangj808@nenu.edu.cn (J. Yang)

E-mail: majf247@yahoo.com (J.-F. Ma)

Fax: +86-431-85098620 (J.-F. Ma)

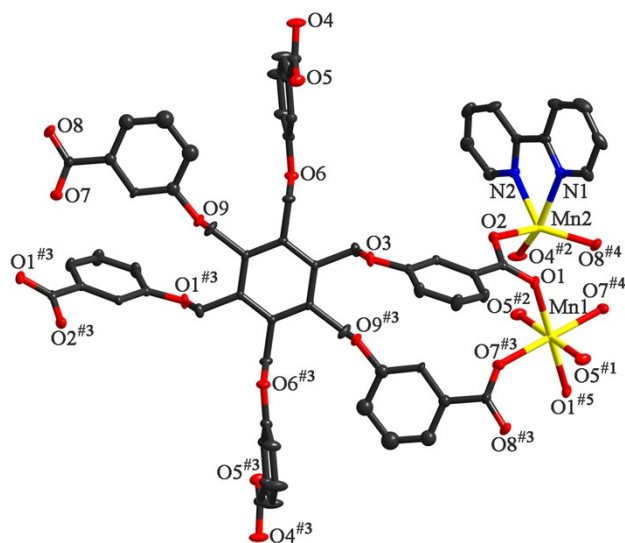

(a)

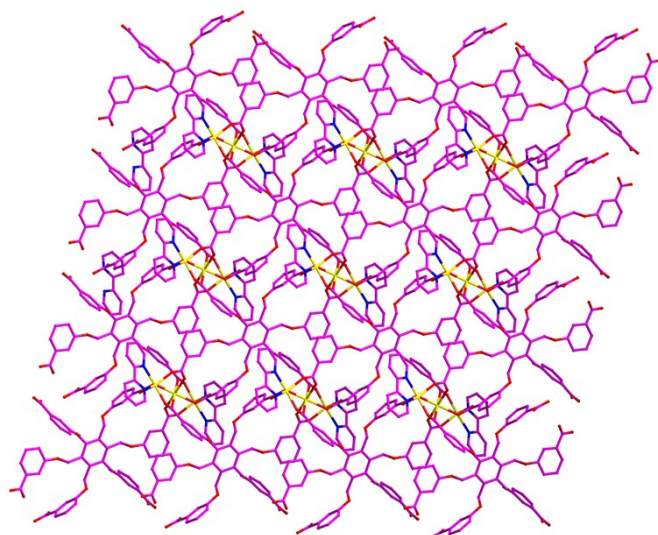

(b)

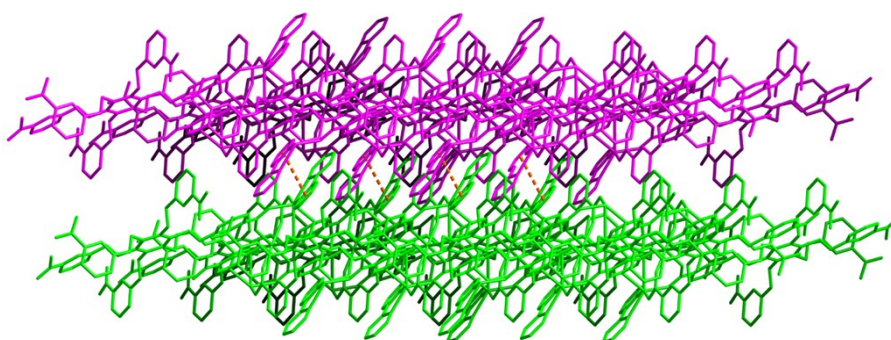

(c)

**Fig. S1** (a) Coordination environments of Mn(II) ions in **3**. (b) The 2D layer built by L anions, 2,2'-bpy ligands and Mn(II) ions. (c) The 3D supramolecular architecture formed by  $\pi$ - $\pi$  stackings.

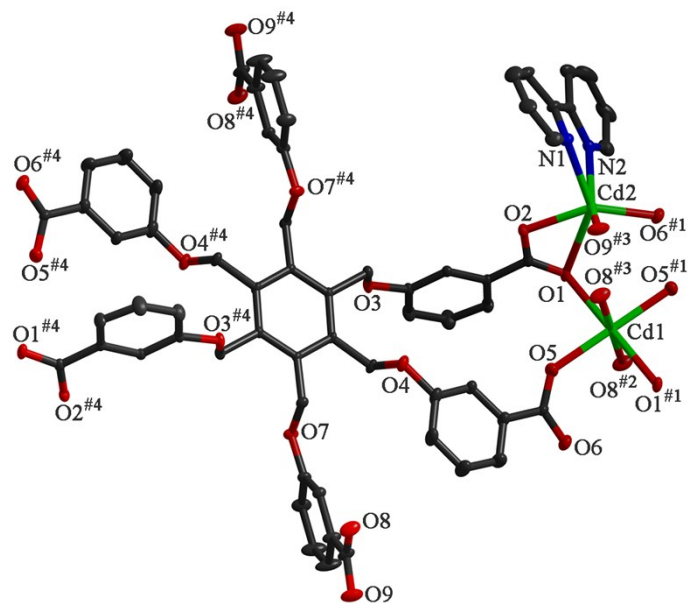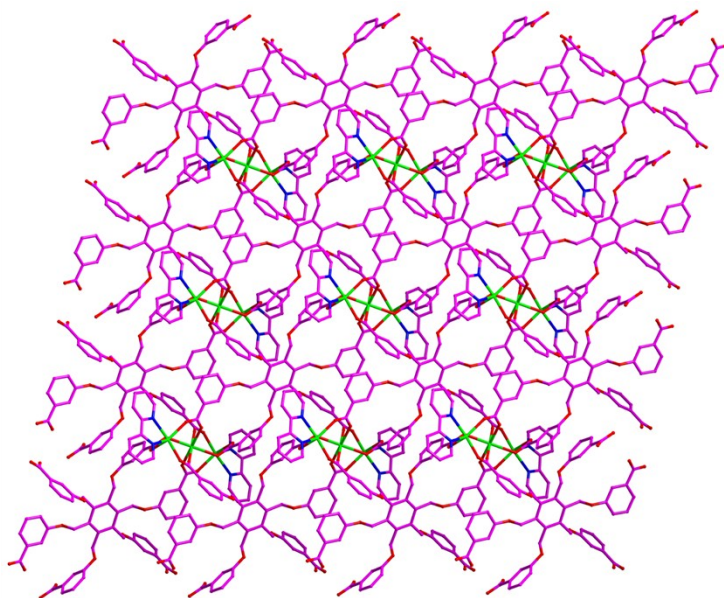

(a)

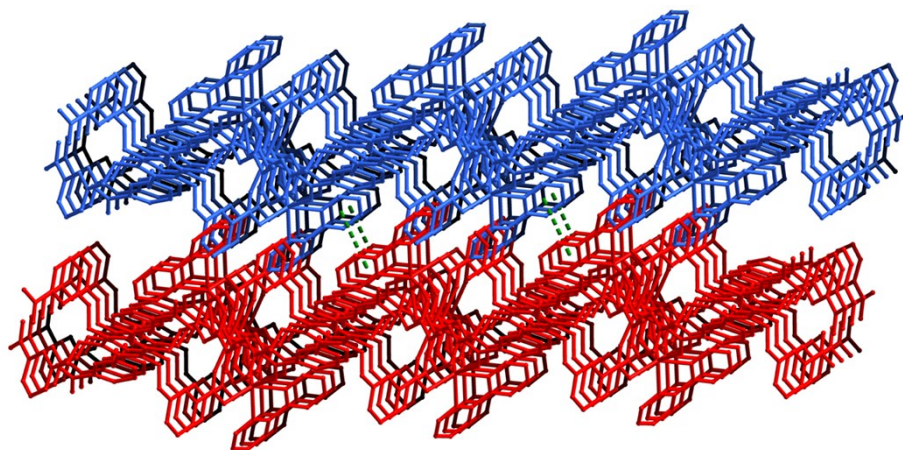

(b)

**Fig. S2** (a) Coordination environments of Cd(II) ions in **4**. (b) The 2D layer built by L anions, 2,2'-bpy ligands and Cd(II) ions in **4**. (c) The 3D supramolecular architecture formed by  $\pi$ - $\pi$  stackings.

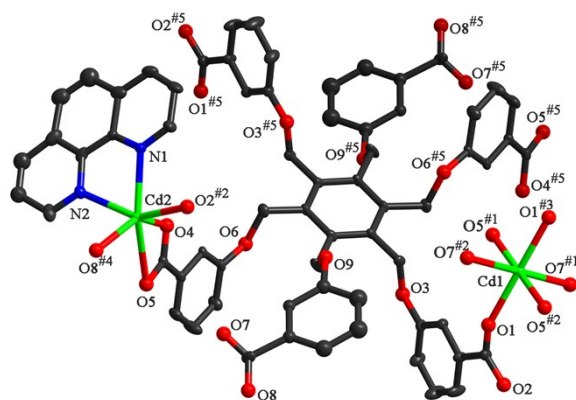

(a)

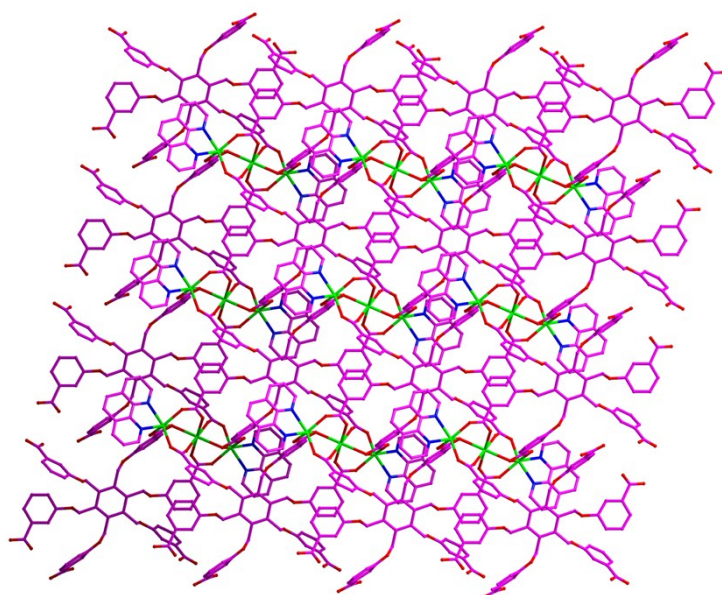

(b)

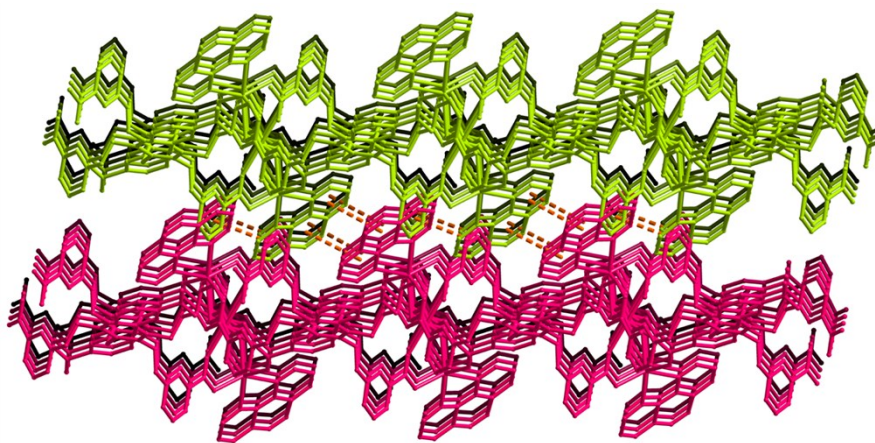

(c)

**Fig. S3** (a) Coordination environments of Cd(II) ions in **5**. (b) View of the 2D layer built through L anions, phen ligands and Cd(II) ions. (c) View of the 3D supramolecular architecture formed by  $\pi$ - $\pi$  stackings.

**Table S1** Selected bond distances (Å) and angles (°) for **1**.

|                                               |            |                                                |           |
|-----------------------------------------------|------------|------------------------------------------------|-----------|
| Mn(1)-O(1)                                    | 2.101(5)   | Mn(1)-O(17) <sup>#2</sup>                      | 2.195(5)  |
| Mn(1)-O(4)                                    | 2.324(4)   | Mn(2)-O(2)                                     | 2.044(5)  |
| Mn(2)-O(8) <sup>#4</sup>                      | 2.081(6)   | Mn(2)-O(16) <sup>#3</sup>                      | 2.088(7)  |
| Mn(2)-O(11) <sup>#5</sup>                     | 2.108(6)   | Mn(2)-O(5) <sup>#1</sup>                       | 2.214(4)  |
| Mn(2)-O(4) <sup>#1</sup>                      | 2.445(4)   | Mn(3)-O(7) <sup>#6</sup>                       | 2.110(5)  |
| Mn(3)-O(13) <sup>#7</sup>                     | 2.131(4)   | Mn(3)-O(10)                                    | 2.148(6)  |
| Mn(3)-O(14)                                   | 2.176(5)   | Mn(3)-O(1W)                                    | 2.256(8)  |
| Mn(3)-O(5) <sup>#8</sup>                      | 2.279(4)   | O(1)-Mn(1)-O(17) <sup>#2</sup>                 | 86.7(2)   |
| O(1) <sup>#1</sup> -Mn(1)-O(17) <sup>#2</sup> | 93.3(2)    | O(1)-Mn(1)-O(17) <sup>#3</sup>                 | 93.3(2)   |
| O(1)-Mn(1)-O(4) <sup>#1</sup>                 | 91.36(17)  | O(17) <sup>#2</sup> -Mn(1)-O(4) <sup>#1</sup>  | 83.22(19) |
| O(1)-Mn(1)-O(4)                               | 88.64(17)  | O(17) <sup>#2</sup> -Mn(1)-O(4)                | 96.78(19) |
| O(2)-Mn(2)-O(8) <sup>#4</sup>                 | 92.8(3)    | O(2)-Mn(2)-O(16) <sup>#3</sup>                 | 91.1(2)   |
| O(8) <sup>#4</sup> -Mn(2)-O(16) <sup>#3</sup> | 95.4(4)    | O(2)-Mn(2)-O(11) <sup>#5</sup>                 | 93.0(2)   |
| O(8) <sup>#4</sup> -Mn(2)-O(11) <sup>#5</sup> | 92.1(3)    | O(16) <sup>#3</sup> -Mn(2)-O(11) <sup>#5</sup> | 171.3(3)  |
| O(2)-Mn(2)-O(5) <sup>#1</sup>                 | 149.51(19) | O(8) <sup>#4</sup> -Mn(2)-O(5) <sup>#1</sup>   | 117.7(2)  |
| O(16) <sup>#3</sup> -Mn(2)-O(5) <sup>#1</sup> | 84.6(2)    | O(11) <sup>#5</sup> -Mn(2)-O(5) <sup>#1</sup>  | 87.9(2)   |
| O(2)-Mn(2)-O(4) <sup>#1</sup>                 | 93.87(18)  | O(8) <sup>#4</sup> -Mn(2)-O(4) <sup>#1</sup>   | 173.3(2)  |
| O(16) <sup>#3</sup> -Mn(2)-O(4) <sup>#1</sup> | 83.7(2)    | O(11) <sup>#5</sup> -Mn(2)-O(4) <sup>#1</sup>  | 88.3(2)   |
| O(5) <sup>#1</sup> -Mn(2)-O(4) <sup>#1</sup>  | 55.67(14)  | O(7) <sup>#6</sup> -Mn(3)-O(13) <sup>#7</sup>  | 170.4(2)  |
| O(7) <sup>#6</sup> -Mn(3)-O(10)               | 92.1(2)    | O(13) <sup>#7</sup> -Mn(3)-O(10)               | 90.9(2)   |
| O(7) <sup>#6</sup> -Mn(3)-O(14)               | 94.7(2)    | O(13) <sup>#7</sup> -Mn(3)-O(14)               | 94.28(17) |
| O(10)-Mn(3)-O(14)                             | 93.5(2)    | O(7) <sup>#6</sup> -Mn(3)-O(1W)                | 86.3(3)   |
| O(13) <sup>#7</sup> -Mn(3)-O(1W)              | 91.6(2)    | O(10)-Mn(3)-O(1W)                              | 174.5(3)  |

|                                               |            |                                              |           |
|-----------------------------------------------|------------|----------------------------------------------|-----------|
| O(14)-Mn(3)-O(1W)                             | 81.4(3)    | O(7) <sup>#6</sup> -Mn(3)-O(5) <sup>#8</sup> | 83.51(18) |
| O(13) <sup>#7</sup> -Mn(3)-O(5) <sup>#8</sup> | 87.07(16)  | O(10)-Mn(3)-O(5) <sup>#8</sup>               | 96.32(19) |
| O(14)-Mn(3)-O(5) <sup>#8</sup>                | 170.04(19) | O(1W)-Mn(3)-O(5) <sup>#8</sup>               | 88.7(2)   |

Symmetry transformations used to generate equivalent atoms: <sup>#1</sup> -x+1,-y,-z+1; <sup>#2</sup> -x+1,-y+1,-z+1; <sup>#3</sup> x, y-1, z; <sup>#4</sup> x+1, -y, z+1/2; <sup>#5</sup> x+1, -y+1, z+1/2; <sup>#6</sup> x, y+1, z; <sup>#7</sup> -x, y, -z+1/2; <sup>#8</sup> -x, y+1, -z+1/2.

**Table S2** Selected bond distances (Å) and angles (°) for **2**.

|                                              |            |                                              |            |
|----------------------------------------------|------------|----------------------------------------------|------------|
| Mn(1)-O(4) <sup>#1</sup>                     | 2.046(3)   | Mn(1)-O(8) <sup>#2</sup>                     | 2.092(3)   |
| Mn(1)-O(6)                                   | 2.092(4)   | Mn(1)-N(2)                                   | 2.301(4)   |
| Mn(1)-N(1)                                   | 2.305(4)   | Mn(2)-O(7)                                   | 2.104(4)   |
| Mn(2)-O(5) <sup>#1</sup>                     | 2.141(3)   | Mn(2)-O(9) <sup>#2</sup>                     | 2.288(3)   |
| O(4) <sup>#1</sup> -Mn(1)-O(8) <sup>#2</sup> | 134.16(16) | O(4) <sup>#1</sup> -Mn(1)-O(6)               | 102.26(18) |
| O(8) <sup>#2</sup> -Mn(1)-O(6)               | 100.60(15) | O(4) <sup>#1</sup> -Mn(1)-N(2)               | 125.91(14) |
| O(8) <sup>#2</sup> -Mn(1)-N(2)               | 95.57(14)  | O(6)-Mn(1)-N(2)                              | 83.84(14)  |
| O(4) <sup>#1</sup> -Mn(1)-N(1)               | 85.22(15)  | O(8) <sup>#2</sup> -Mn(1)-N(1)               | 91.86(12)  |
| O(6)-Mn(1)-N(1)                              | 153.06(15) | N(2)-Mn(1)-N(1)                              | 71.15(14)  |
| O(7)-Mn(2)-O(5) <sup>#1</sup>                | 92.67(16)  | O(7)-Mn(2)-O(5) <sup>#8</sup>                | 87.33(16)  |
| O(7)-Mn(2)-O(9) <sup>#9</sup>                | 91.58(13)  | O(5) <sup>#1</sup> -Mn(2)-O(9) <sup>#9</sup> | 90.46(12)  |
| O(7)-Mn(2)-O(9) <sup>#2</sup>                | 88.42(13)  | O(5) <sup>#1</sup> -Mn(2)-O(9) <sup>#2</sup> | 89.54(12)  |

Symmetry transformations used to generate equivalent atoms: <sup>#1</sup> x, y-1, z; <sup>#2</sup> x, y, z-1; <sup>#8</sup> -x+2, -y+1, -z+1; <sup>#9</sup> -x+2, -y, -z+2.

**Table S3** Selected bond distances (Å) and angles (°) for **3**.

|                                              |           |                                              |           |
|----------------------------------------------|-----------|----------------------------------------------|-----------|
| Mn(1)-O(5) <sup>#1</sup>                     | 2.102(4)  | Mn(1)-O(7) <sup>#3</sup>                     | 2.131(4)  |
| Mn(1)-O(1)                                   | 2.266(4)  | Mn(2)-O(8) <sup>#4</sup>                     | 2.035(4)  |
| Mn(2)-O(4) <sup>#2</sup>                     | 2.062(4)  | Mn(2)-O(2)                                   | 2.075(4)  |
| Mn(2)-N(1)                                   | 2.278(5)  | Mn(2)-N(2)                                   | 2.294(4)  |
| O(5) <sup>#1</sup> -Mn(1)-O(7) <sup>#3</sup> | 92.14(18) | O(5) <sup>#1</sup> -Mn(1)-O(7) <sup>#4</sup> | 87.86(18) |
| O(5) <sup>#1</sup> -Mn(1)-O(1)               | 91.21(16) | O(5) <sup>#2</sup> -Mn(1)-O(1)               | 88.79(16) |
| O(7) <sup>#3</sup> -Mn(1)-O(1)               | 90.15(15) | O(7) <sup>#4</sup> -Mn(1)-O(1)               | 89.85(15) |

|                                              |            |                                |            |
|----------------------------------------------|------------|--------------------------------|------------|
| O(8) <sup>#4</sup> -Mn(2)-O(4) <sup>#2</sup> | 100.9(2)   | O(8) <sup>#4</sup> -Mn(2)-O(2) | 133.04(18) |
| O(4) <sup>#2</sup> -Mn(2)-O(2)               | 100.1(2)   | O(8) <sup>#4</sup> -Mn(2)-N(1) | 86.02(19)  |
| O(4) <sup>#2</sup> -Mn(2)-N(1)               | 152.44(17) | O(2)-Mn(2)-N(1)                | 94.05(17)  |
| O(8) <sup>#4</sup> -Mn(2)-N(2)               | 125.35(18) | O(4) <sup>#2</sup> -Mn(2)-N(2) | 84.49(17)  |
| O(2)-Mn(2)-N(2)                              | 98.09(17)  | N(1)-Mn(2)-N(2)                | 70.11(18)  |

Symmetry transformations used to generate equivalent atoms: <sup>#1</sup> -x+1, -y+1, -z-1;

<sup>#2</sup> x, y, z+1; <sup>#3</sup> -x+1, -y+2, -z-1; <sup>#4</sup> x, y-1, z+1.

**Table S4** Selected bond distances (Å) and angles (°) for **4**.

|                                              |            |                                |            |
|----------------------------------------------|------------|--------------------------------|------------|
| Cd(1)-O(5)                                   | 2.208(5)   | Cd(1)-O(8) <sup>#2</sup>       | 2.212(5)   |
| Cd(1)-O(1)                                   | 2.384(4)   | Cd(2)-O(6) <sup>#1</sup>       | 2.188(4)   |
| Cd(2)-O(9) <sup>#3</sup>                     | 2.201(5)   | Cd(2)-O(2)                     | 2.211(4)   |
| Cd(2)-N(2)                                   | 2.348(5)   | Cd(2)-N(1)                     | 2.400(5)   |
| O(5)-Cd(1)-O(8) <sup>#2</sup>                | 91.5(2)    | O(5)-Cd(1)-O(8) <sup>#3</sup>  | 88.5(2)    |
| O(5) <sup>#1</sup> -Cd(1)-O(1)               | 91.19(16)  | O(5)-Cd(1)-O(1)                | 88.81(16)  |
| O(8) <sup>#2</sup> -Cd(1)-O(1)               | 91.75(17)  | O(8) <sup>#3</sup> -Cd(1)-O(1) | 88.25(17)  |
| O(6) <sup>#1</sup> -Cd(2)-O(9) <sup>#3</sup> | 104.6(2)   | O(6) <sup>#1</sup> -Cd(2)-O(2) | 137.49(19) |
| O(9) <sup>#3</sup> -Cd(2)-O(2)               | 100.4(2)   | O(6) <sup>#1</sup> -Cd(2)-N(2) | 82.86(18)  |
| O(9) <sup>#3</sup> -Cd(2)-N(2)               | 146.15(19) | O(2)-Cd(2)-N(2)                | 94.98(16)  |
| O(6) <sup>#1</sup> -Cd(2)-N(1)               | 123.82(19) | O(9) <sup>#3</sup> -Cd(2)-N(1) | 81.70(19)  |
| O(2)-Cd(2)-N(1)                              | 93.23(17)  | N(2)-Cd(2)-N(1)                | 67.39(19)  |

Symmetry transformations used to generate equivalent atoms: <sup>#1</sup> -x+2, -y, -z+2;

<sup>#2</sup> x, y+1, z; <sup>#3</sup> -x+2, -y-1, -z+2.

**Table S5** Selected bond distances (Å) and angles (°) for **5**.

|                                              |           |                                |          |
|----------------------------------------------|-----------|--------------------------------|----------|
| Cd(1)-O(7) <sup>#1</sup>                     | 2.208(6)  | Cd(1)-O(1)                     | 2.212(6) |
| Cd(1)-O(5) <sup>#1</sup>                     | 2.403(5)  | Cd(2)-O(8) <sup>#4</sup>       | 2.186(6) |
| Cd(2)-O(2) <sup>#2</sup>                     | 2.205(6)  | Cd(2)-O(4)                     | 2.215(5) |
| Cd(2)-N(2)                                   | 2.370(6)  | Cd(2)-N(1)                     | 2.389(6) |
| O(7) <sup>#1</sup> -Cd(1)-O(1)               | 92.6(3)   | O(7) <sup>#2</sup> -Cd(1)-O(1) | 87.4(3)  |
| O(7) <sup>#1</sup> -Cd(1)-O(5) <sup>#1</sup> | 88.64(19) | O(1)-Cd(1)-O(5) <sup>#1</sup>  | 92.3(2)  |

|                                              |           |                                |          |
|----------------------------------------------|-----------|--------------------------------|----------|
| O(7) <sup>#1</sup> -Cd(1)-O(5) <sup>#2</sup> | 91.36(19) | O(1)-Cd(1)-O(5) <sup>#2</sup>  | 87.7(2)  |
| O(8) <sup>#4</sup> -Cd(2)-O(2) <sup>#2</sup> | 105.4(3)  | O(8) <sup>#4</sup> -Cd(2)-O(4) | 135.5(2) |
| O(2) <sup>#2</sup> -Cd(2)-O(4)               | 101.7(3)  | O(8) <sup>#4</sup> -Cd(2)-N(2) | 82.4(3)  |
| O(2) <sup>#2</sup> -Cd(2)-N(2)               | 147.1(2)  | O(4)-Cd(2)-N(2)                | 93.4(2)  |
| O(8) <sup>#4</sup> -Cd(2)-N(1)               | 125.7(2)  | O(2) <sup>#2</sup> -Cd(2)-N(1) | 81.2(2)  |
| O(4)-Cd(2)-N(1)                              | 92.7(2)   | N(2)-Cd(2)-N(1)                | 68.9(2)  |

Symmetry transformations used to generate equivalent atoms: <sup>#1</sup> x, y+1, z;

<sup>#2</sup> -x, -y+1, -z+2; <sup>#4</sup> -x, -y, -z+2.

**Table S6** Selected bond distances (Å) and angles (°) for **6**.

|                                               |            |                                               |            |
|-----------------------------------------------|------------|-----------------------------------------------|------------|
| Co(1)-O(18) <sup>#1</sup>                     | 2.005(3)   | Co(1)-O(16)                                   | 2.083(2)   |
| Co(1)-O(7) <sup>#2</sup>                      | 2.098(3)   | Co(1)-N(4)                                    | 2.100(4)   |
| Co(1)-N(3)                                    | 2.158(3)   | Co(1)-O(8) <sup>#2</sup>                      | 2.385(4)   |
| Co(2)-O(15)                                   | 2.049(3)   | Co(2)-O(14) <sup>#1</sup>                     | 2.049(3)   |
| Co(2)-N(2)                                    | 2.123(3)   | Co(2)-N(1)                                    | 2.127(3)   |
| Co(2)-O(10) <sup>#3</sup>                     | 2.130(3)   | Co(2)-O(9) <sup>#3</sup>                      | 2.258(3)   |
| Na(1)-O(11)                                   | 2.246(4)   | Na(1)-O(17) <sup>#4</sup>                     | 2.292(3)   |
| Na(1)-O(8) <sup>#5</sup>                      | 2.304(3)   | Na(1)-O(16) <sup>#6</sup>                     | 2.365(3)   |
| Na(1)-O(9)                                    | 2.432(3)   | Na(1)-O(14) <sup>#4</sup>                     | 2.506(3)   |
| O(18) <sup>#1</sup> -Co(1)-O(16)              | 98.69(12)  | O(18) <sup>#1</sup> -Co(1)-O(7) <sup>#2</sup> | 95.48(13)  |
| O(16)-Co(1)-O(7) <sup>#2</sup>                | 141.71(13) | O(18) <sup>#1</sup> -Co(1)-N(4)               | 92.08(14)  |
| O(16)-Co(1)-N(4)                              | 119.57(13) | O(7) <sup>#2</sup> -Co(1)-N(4)                | 95.11(14)  |
| O(18) <sup>#1</sup> -Co(1)-N(3)               | 168.94(14) | O(16)-Co(1)-N(3)                              | 83.99(11)  |
| O(7) <sup>#2</sup> -Co(1)-N(3)                | 88.80(12)  | N(4)-Co(1)-N(3)                               | 77.36(14)  |
| O(18) <sup>#1</sup> -Co(1)-O(8) <sup>#2</sup> | 99.34(13)  | O(16)-Co(1)-O(8) <sup>#2</sup>                | 85.06(11)  |
| O(7) <sup>#2</sup> -Co(1)-O(8) <sup>#2</sup>  | 57.53(11)  | N(4)-Co(1)-O(8) <sup>#2</sup>                 | 151.04(12) |
| N(3)-Co(1)-O(8) <sup>#2</sup>                 | 91.57(13)  | O(15)-Co(2)-O(14) <sup>#1</sup>               | 97.77(11)  |
| O(15)-Co(2)-N(2)                              | 103.81(12) | O(14) <sup>#1</sup> -Co(2)-N(2)               | 98.40(12)  |



|                                                |            |                                                    |            |
|------------------------------------------------|------------|----------------------------------------------------|------------|
| O(15)-Co(2)-N(1)                               | 83.12(12)  | O(14) <sup>#1</sup> -Co(2)-N(1)                    | 176.12(12) |
| N(2)-Co(2)-N(1)                                | 77.73(13)  | O(15)-Co(2)-O(10) <sup>#3</sup>                    | 156.50(11) |
| O(14) <sup>#1</sup> -Co(2)-O(10) <sup>#3</sup> | 92.48(12)  | N(2)-Co(2)-O(10) <sup>#3</sup>                     | 95.48(12)  |
| N(1)-Co(2)-O(10) <sup>#3</sup>                 | 88.07(12)  | O(15)-Co(2)-O(9) <sup>#3</sup>                     | 99.27(10)  |
| O(14) <sup>#1</sup> -Co(2)-O(9) <sup>#3</sup>  | 88.08(10)  | N(2)-Co(2)-O(9) <sup>#3</sup>                      | 154.88(12) |
| N(1)-Co(2)-O(9) <sup>#3</sup>                  | 95.51(11)  | O(10) <sup>#3</sup> -Co(2)-O(9) <sup>#3</sup>      | 59.86(10)  |
| O(11)-Na(1)-O(17) <sup>#4</sup>                | 93.46(13)  | O(11)-Na(1)-O(8) <sup>#5</sup>                     | 104.60(13) |
| O(17) <sup>#4</sup> -Na(1)-O(8) <sup>#5</sup>  | 94.42(14)  | O(11)-Na(1)-O(16) <sup>#6</sup>                    | 173.08(13) |
| O(17) <sup>#4</sup> -Na(1)-O(16) <sup>#6</sup> | 81.76(12)  | O(8) <sup>#5</sup> -Na(1)-O(16) <sup>#6</sup>      | 80.86(12)  |
| O(11)-Na(1)-O(9)                               | 90.45(12)  | O(17) <sup>#4</sup> -Na(1)-O(9)                    | 166.79(14) |
| O(8) <sup>#5</sup> -Na(1)-O(9)                 | 96.80(12)  | O(16) <sup>#6</sup> -Na(1)-O(9)                    | 93.13(10)  |
| O(11)-Na(1)-O(14) <sup>#4</sup>                | 91.07(12)  | O(17) <sup>#4</sup> -Na(1)-<br>O(14) <sup>#4</sup> | 92.55(12)  |
| O(8) <sup>#5</sup> -Na(1)-O(14) <sup>#4</sup>  | 162.40(13) | O(16) <sup>#6</sup> -Na(1)-<br>O(14) <sup>#4</sup> | 84.17(10)  |
| O(9)-Na(1)-O(14) <sup>#4</sup>                 | 74.75(9)   |                                                    |            |

Symmetry transformations used to generate equivalent atoms: <sup>#1</sup> -x+1/2, y+1/2, -z+3/2; <sup>#2</sup> -x, -y, -z+1; <sup>#3</sup> x, y, z-1; <sup>#4</sup> -x+1/2, y+1/2, -z+5/2; <sup>#5</sup> -x, -y, -z+2; <sup>#6</sup> x, y, z+1.

**Table S7** Selected bond distances (Å) and angles (°) for **7**.

|                                              |            |                                              |            |
|----------------------------------------------|------------|----------------------------------------------|------------|
| Co(1)-O(8) <sup>#2</sup>                     | 2.047(3)   | Co(1)-O(4) <sup>#4</sup>                     | 2.117(4)   |
| Co(1)-O(2)                                   | 2.123(3)   | Co(2)-O(7) <sup>#2</sup>                     | 1.952(4)   |
| Co(2)-O(5) <sup>#4</sup>                     | 1.963(4)   | Co(2)-O(1)                                   | 2.021(3)   |
| Co(2)-N(1)                                   | 2.072(4)   | Co(2)-O(2)                                   | 2.237(3)   |
| O(8) <sup>#2</sup> -Co(1)-O(4) <sup>#4</sup> | 92.31(14)  | O(8) <sup>#2</sup> -Co(1)-O(4) <sup>#3</sup> | 87.69(14)  |
| O(8) <sup>#2</sup> -Co(1)-O(2)               | 92.84(13)  | O(8) <sup>#1</sup> -Co(1)-O(2)               | 87.16(13)  |
| O(4) <sup>#4</sup> -Co(1)-O(2)               | 90.59(13)  | O(4) <sup>#3</sup> -Co(1)-O(2)               | 89.41(13)  |
| O(7) <sup>#2</sup> -Co(2)-O(5) <sup>#4</sup> | 125.46(16) | O(7) <sup>#2</sup> -Co(2)-O(1)               | 116.99(18) |
| O(5) <sup>#4</sup> -Co(2)-O(1)               | 112.13(16) | O(7) <sup>#2</sup> -Co(2)-N(1)               | 84.83(16)  |
| O(5) <sup>#4</sup> -Co(2)-N(1)               | 105.94(16) | O(1)-Co(2)-N(1)                              | 103.25(15) |
| O(7) <sup>#2</sup> -Co(2)-O(2)               | 92.81(14)  | O(5) <sup>#4</sup> -Co(2)-O(2)               | 91.35(14)  |

|                 |           |                 |            |
|-----------------|-----------|-----------------|------------|
| O(1)-Co(2)-O(2) | 60.55(13) | N(1)-Co(2)-O(2) | 160.33(16) |
|-----------------|-----------|-----------------|------------|

Symmetry transformations used to generate equivalent atoms: <sup>#1</sup> -x+2, -y+1, -z;  
<sup>#2</sup> x, y-1, z; <sup>#3</sup> -x+2, -y, -z-1; <sup>#4</sup> x, y, z+1.

**Table S8** Selected bond distances (Å) and angles (°) for **8**.

|                 |           |                 |           |
|-----------------|-----------|-----------------|-----------|
| Cu(1)-N(2)      | 2.033(10) | Cu(1)-N(4)      | 2.046(8)  |
| Cu(1)-N(3)      | 2.060(8)  | Cu(1)-N(1)      | 2.039(10) |
| N(2)-Cu(1)-N(4) | 110.7(5)  | N(2)-Cu(1)-N(3) | 110.5(5)  |
| N(4)-Cu(1)-N(3) | 106.0(5)  | N(2)-Cu(1)-N(1) | 104.1(5)  |
| N(4)-Cu(1)-N(1) | 113.3(5)  | N(3)-Cu(1)-N(1) | 112.3(6)  |

**Table S9a** Selected bond distances (Å) and angles (°) for **9**.

|                               |            |                               |            |
|-------------------------------|------------|-------------------------------|------------|
| Cu(1)-N(2)                    | 1.928(3)   | Cu(1)-O(1)                    | 1.935(3)   |
| Cu(1)-N(1)                    | 2.008(3)   | Cu(1)-N(3)                    | 2.020(3)   |
| Cu(1)-O(8) <sup>#1</sup>      | 2.141(2)   | N(2)-Cu(1)-O(1)               | 157.41(11) |
| N(2)-Cu(1)-N(1)               | 79.72(12)  | O(1)-Cu(1)-N(1)               | 94.91(12)  |
| N(2)-Cu(1)-N(3)               | 79.44(12)  | O(1)-Cu(1)-N(3)               | 103.21(12) |
| N(1)-Cu(1)-N(3)               | 158.94(13) | N(2)-Cu(1)-O(8) <sup>#1</sup> | 111.52(11) |
| O(1)-Cu(1)-O(8) <sup>#1</sup> | 90.94(11)  | N(1)-Cu(1)-O(8) <sup>#1</sup> | 99.03(11)  |
| N(3)-Cu(1)-O(8) <sup>#1</sup> | 91.39(11)  |                               |            |

**Table S9b** Hydrogen bonds for **9** (Å and °).

| D-H...A                          | d(D-H)    | d(H...A)  | d(D...A) | <(DHA) |
|----------------------------------|-----------|-----------|----------|--------|
| O(10)-H(10)...O(8)               | 0.82      | 2.09      | 2.839(4) | 151.5  |
| O(1W)-H(1A)...O(2)               | 0.914(10) | 2.03(3)   | 2.898(6) | 159(8) |
| O(6)-H(6)...O(9) <sup>#4</sup>   | 0.96(7)   | 1.62(7)   | 2.548(5) | 161(6) |
| O(1W)-H(1B)...O(5) <sup>#5</sup> | 0.911(10) | 2.029(19) | 2.924(6) | 167(7) |

Symmetry transformations used to generate equivalent atoms: <sup>#1</sup> x+1, y, z; <sup>#4</sup> x+1,  
y+1, z; <sup>#5</sup> -x+1, -y+1, -z.
